# Supplementary material for: Parasitaemia data and molecular characterization of Haemoproteus catharti from New World vultures (Cathartidae) reveals a novel clade of Haemosporida
Source: Springer Nature journal article supplement (doi:10.1186/s12936-017-2165-5), 2018-01-08
Supplement: MOESM1 [file 15350022]

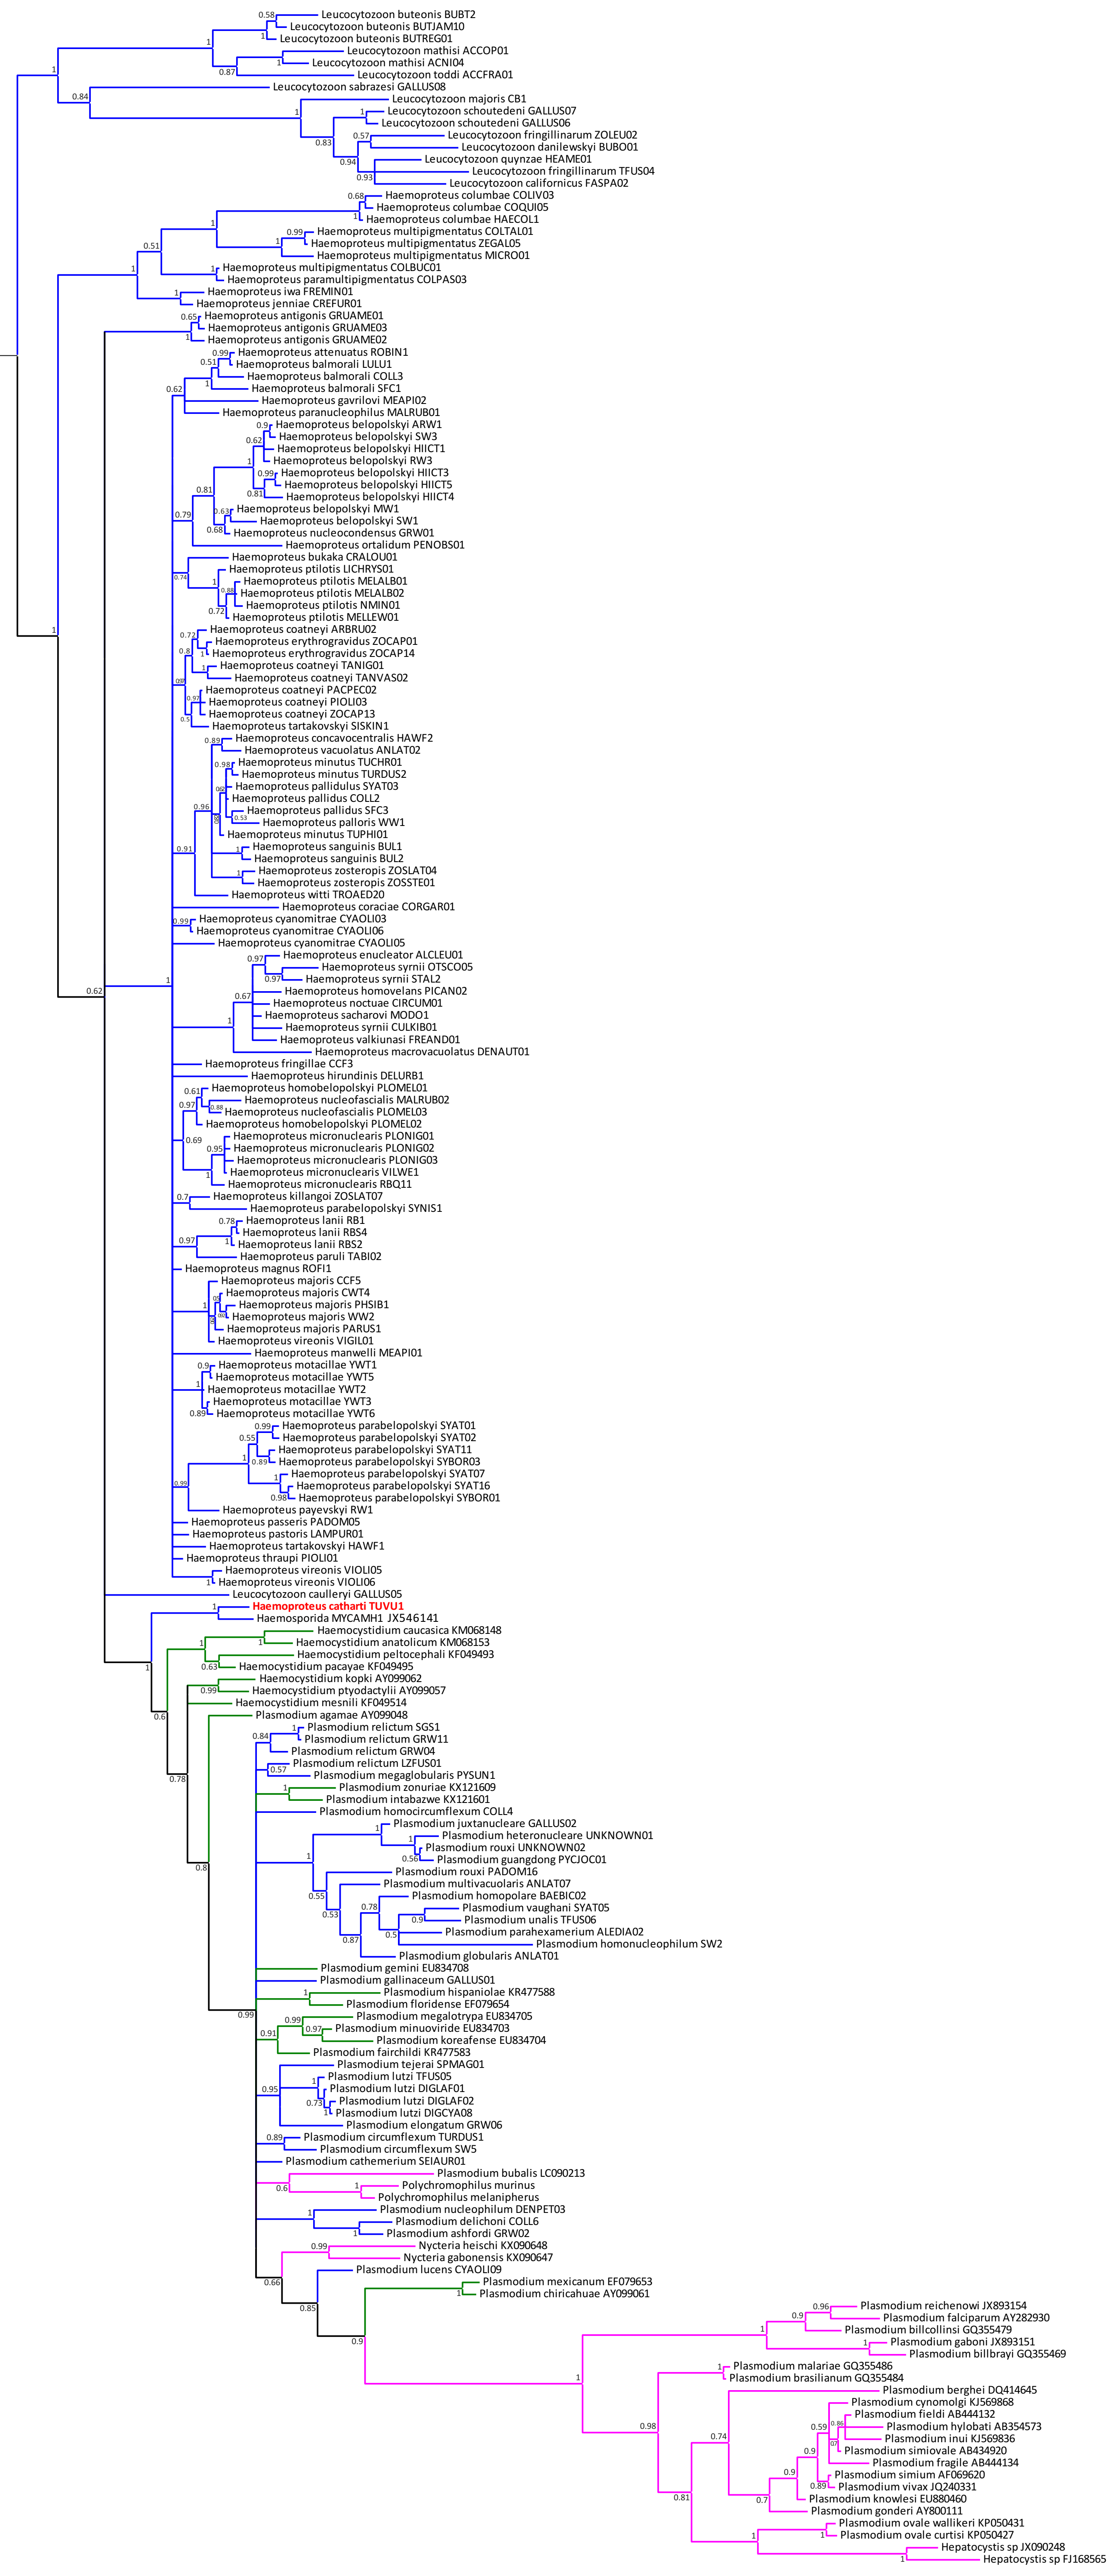

0.05
